# Supplementary material for: Time-series cohort study to forecast emergency department visits in the city of Milan and predict high demand: a 2-day warning system
Source: HighWire-hosted journal article supplement (doi:10.1136/bmjopen-2021-056017), 2022-04-01
Supplement: bmjopen-2021-056017supp001_data_supplement.pdf [file bmjopen-2021-056017supp001_data_supplement.pdf]

### Description of Training and validation sets

Patients were mostly female (50.6%), with a mean age of 44 years (standard deviation s.d. of 26 years). The mean number of daily visits was similar in genders. Higher ED accesses volumes were found among people aged over 65 years than the others ages. During the study period, mean temperature was 16°C, mean RH was 63%, and there was precipitation on 31% of the days. Mean level of NO<sub>2</sub> exceeded the European limit (40 µg/m<sup>3</sup>), with a mean of 46 µg/m<sup>3</sup>, while mean PM<sub>10</sub> was lower than the European limit, with a mean of 35 µg/m<sup>3</sup>, during the observed period. On days-before and after festivities, we measured a higher number of visits, while on festivity days there was a lower number of visits compare to normal days. Training and validation sets were similar according to meteorological factors, but there were mild differences in air pollution and ILI rates (supplementary Table 1). The year 2019 was in fact characterized by significantly higher levels of pollution (t-test p-values<0.001) and lower ILI rates (t-test p-value<0.01) compared to the previous years. Patients were slightly younger in the training set than in the validation set, the mean age being 43 years in the former and 45 in the latter. The number of ED accesses was statistically different across age groups between days: children (0-14 years) tended to visit ED more likely on weekends (20% higher on Sundays compared to other days) while adults and senior people (15-65 and >65 years) on Mondays (14% and 11% higher than other days) (Anova test for mean differences p-values<0.001). August was the months with smaller ED accesses volumes, with a 14% decrease compared to the average of the other months.

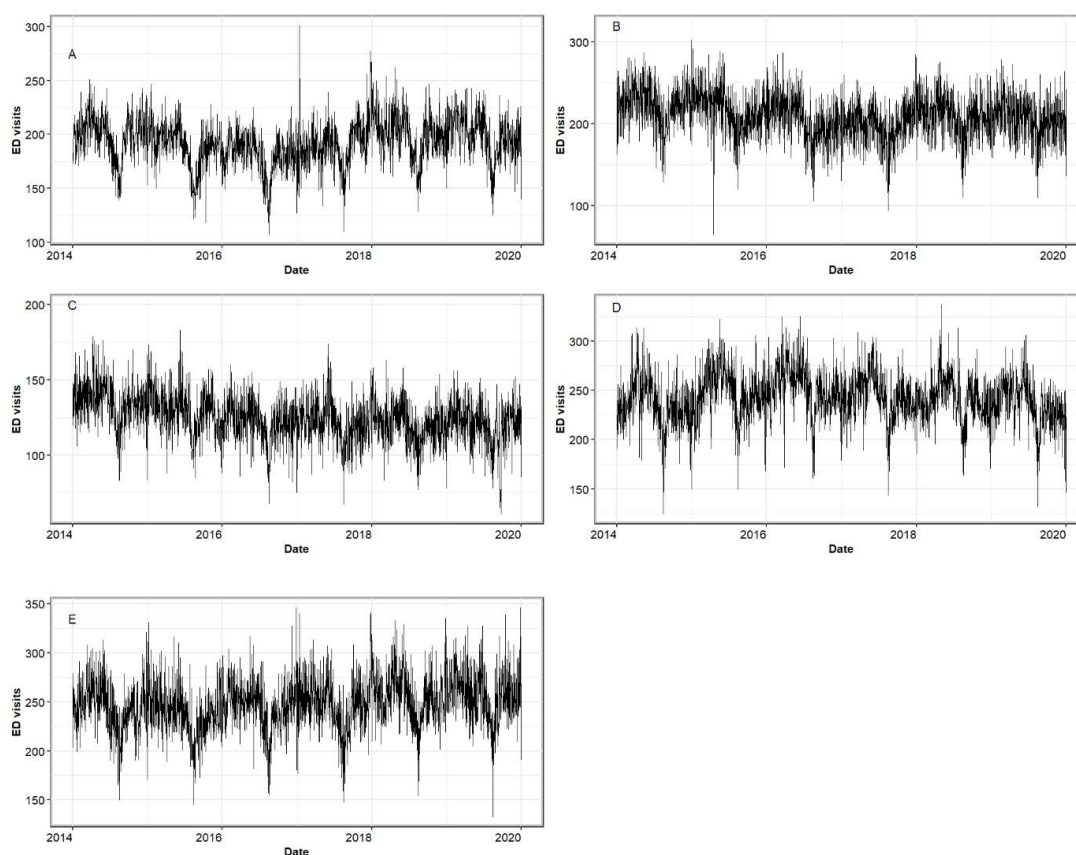

**Supplementary Table 1**

Mean, standard deviation and t-test for mean difference between training and validation sets by covariates.

|                                                       | Mean (s.d.)  |            | t-test<br>p-value |
|-------------------------------------------------------|--------------|------------|-------------------|
|                                                       | Training     | Validation |                   |
| Female (%)                                            | 50.6         | 50.4       | -                 |
| Age (years)                                           | 43 (26)      | 45 (26)    | <0.001            |
| Temperature (°C)                                      | 15.7 (8)     | 16.4 (8)   | 0.1257            |
| Relative Humidity (%)                                 | 63.4<br>(17) | 62.3 (17)  | 0.2765            |
| Cumulative Precipitation (mm)                         | 2.3 (6.6)    | 2.2 (5.8)  | 0.7155            |
| NO <sub>2</sub> (µg/m <sup>3</sup> )                  | 47 (19)      | 39 (17)    | <0.001            |
| PM <sub>10</sub> (µg/m <sup>3</sup> )                 | 36 (21)      | 30 (18)    | <0.001            |
| ILI (new cases per 1,000 inhabitants)                 | 1.9 (3)      | 2.6 (3.8)  | <0.001            |
| S.d.=standard deviation<br>ILI=Influenza-Like-Illness |              |            |                   |

**Supplementary Figure 1**

Autocorrelation function (ACF) and correlation among residuals according to the Ljung-Box test (LB) by hospital: (a) ACF up to lag 30; (b) LB test up to lag 30; (c) ACF up to lag 366; (d) LB test up to lag 366.

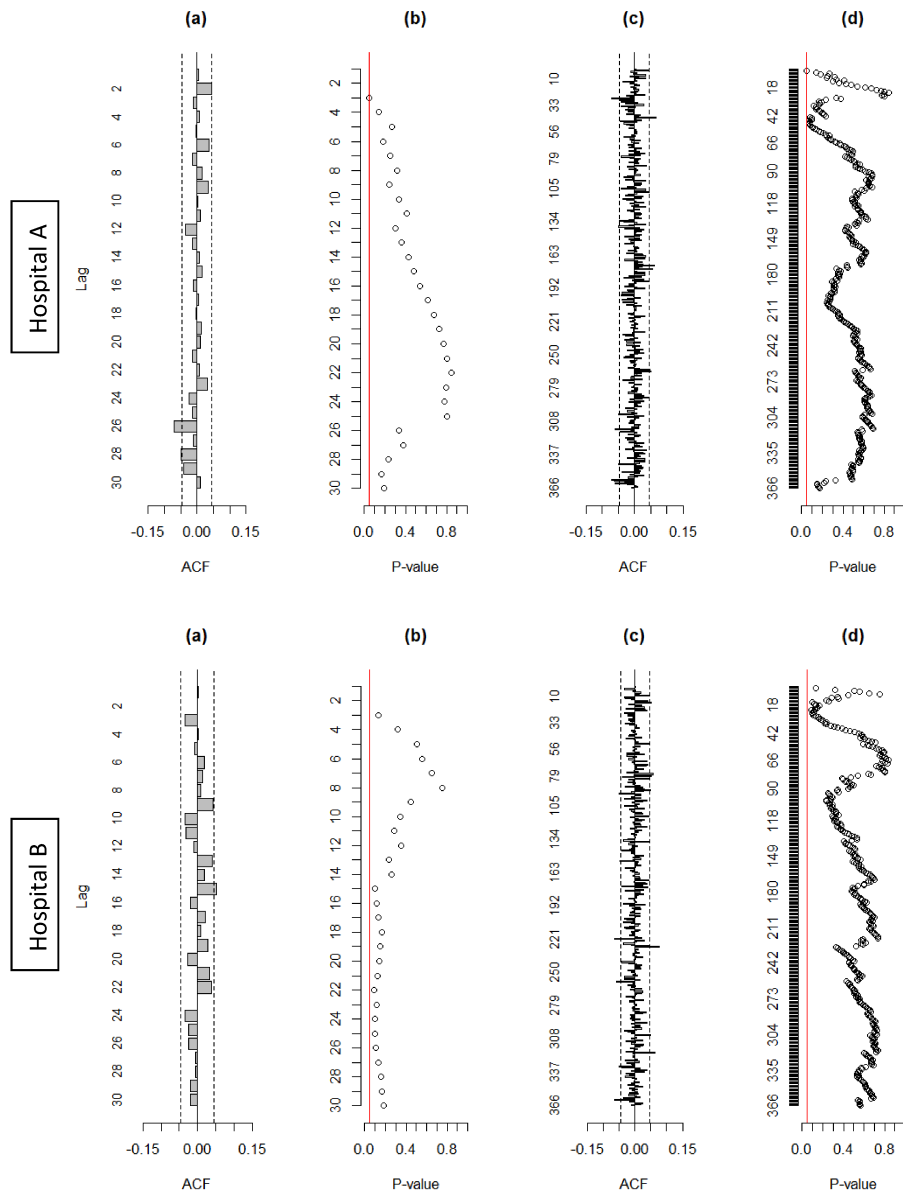

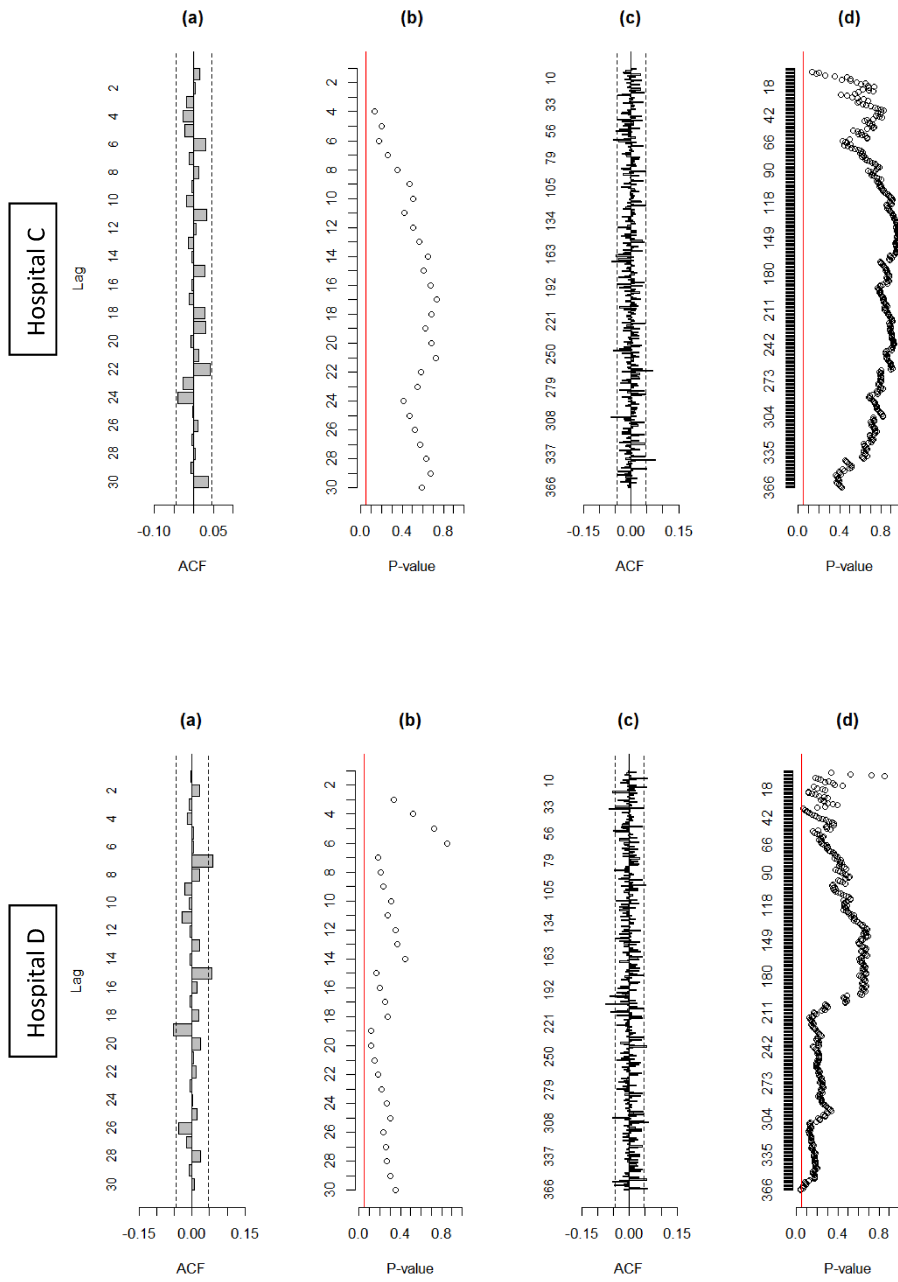

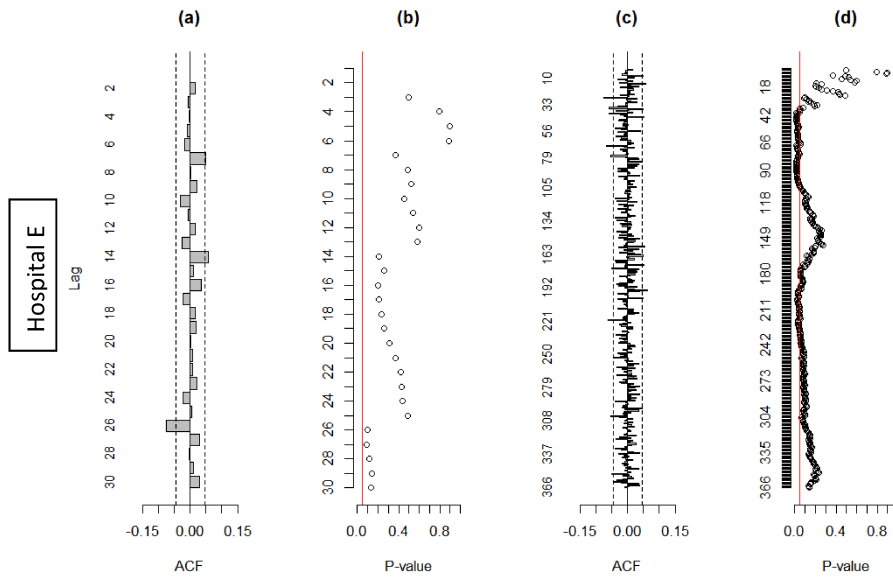

**Supplementary Table 2**

Auto-regressive integrated moving average (ARIMA) parameters, indicators of performance (accuracy of predictions in the validation sets, and accuracy of high demand classification), Akaike Information Criteria (AIC) and relative error mean for outliers.

|            | Number of outliers' days* | Mean temperature |      |              |                       |       | Minimum Temperature |      |              |                       |       | Maximum Temp   |      |              |                       |       | Apparent Temperature |      |              |                      |       |
|------------|---------------------------|------------------|------|--------------|-----------------------|-------|---------------------|------|--------------|-----------------------|-------|----------------|------|--------------|-----------------------|-------|----------------------|------|--------------|----------------------|-------|
|            |                           | Beta (se)        | MAPE | Accuracy (%) | Relative error mean** | AIC   | Beta (se)           | MAPE | Accuracy (%) | Relative error mean** | AIC   | Beta (se)      | MAPE | Accuracy (%) | Relative error mean** | AIC   | Beta (se)            | MAPE | Accuracy (%) | Relative Error mean* | AIC   |
| Hospital A | 2                         | 1.29<br>(0.15)   | 5.9  | 72           | 55.3                  | 14861 | 1.13<br>(0.15)      | 5.9  | 73           | 55.1                  | 14882 | 1.03<br>(0.12) | 5.9  | 72           | 55.1                  | 14864 | 1.03<br>(0.13)       | 5.9  | 72           | 55.5                 | 14870 |
| Hospital B | 6                         | 1.23<br>(0.14)   | 5.7  | 72           | 44.7                  | 14847 | 1.02<br>(0.15)      | 5.7  | 74           | 44.1                  | 14874 | 0.98<br>(0.11) | 5.7  | 73           | 45.6                  | 14850 | 1.04<br>(0.12)       | 5.7  | 73           | 44.9                 | 14846 |
| Hospital C | 5                         | 0.68<br>(0.11)   | 8.1  | 67           | 36.5                  | 13928 | 0.57<br>(0.11)      | 8.1  | 67           | 36.8                  | 13941 | 0.55<br>(0.09) | 8.1  | 66           | 36.5                  | 13925 | 0.54<br>(0.09)       | 8.1  | 66           | 36.8                 | 13934 |
| Hospital D | 7                         | 1.16<br>(0.18)   | 5.5  | 76           | 22.3                  | 15506 | 1.00<br>(0.18)      | 5.6  | 76           | 22.6                  | 15516 | 0.96<br>(0.15) | 5.6  | 75           | 22.4                  | 15508 | 0.88<br>(0.15)       | 5.5  | 76           | 22.3                 | 15511 |
| Hospital E | 6                         | 1.84<br>(0.18)   | 6.1  | 74           | 24.4                  | 15624 | 1.68<br>(0.19)      | 6.1  | 73           | 24                    | 15649 | 1.5<br>(0.14)  | 6.1  | 73           | 24.9                  | 15622 | 1.53<br>(0.16)       | 6.3  | 71           | 24.2                 | 15811 |

\*Number of outliers' days replaced by the mean of the observations of the same day in the other years for normalization of results  
\*\*Relative error mean of observed vs predicted values calculated for outliers (in the training sets only) which were replaced by the mean of the observations of the same day in the other years for normalization of residuals

**Supplementary Table 3**

Model comparisons between the regression model with ARIMA errors and: a simple regression model (M1) and a generalized linear model (M2).

|            | Linear model (M1 <sup>a</sup> ) |              | Likelihood ratio test* |         | Generalized linear model (M2 <sup>b</sup> ) |              | Likelihood ratio test** |         |
|------------|---------------------------------|--------------|------------------------|---------|---------------------------------------------|--------------|-------------------------|---------|
|            | MAPE                            | Accuracy (%) | LRT (df)               | p-value | MAPE                                        | Accuracy (%) | LRT (df)                | p-value |
| Hospital A | 17.4                            | 52           | 3957 (34)              | <0.001  | 11.9                                        | 56           | 2618 (2)                | <0.001  |
| Hospital B | 25.3                            | 49           | 5610 (36)              | <0.001  | 13.2                                        | 60           | 3318 (2)                | <0.001  |
| Hospital C | 20.8                            | 51           | 3975 (35)              | <0.001  | 14.4                                        | 58           | 2662 (3)                | <0.001  |
| Hospital D | 13.5                            | 51           | 3289 (40)              | <0.001  | 9.8                                         | 57           | 2164 (2)                | <0.001  |
| Hospital E | 23.9                            | 55           | 5222 (38)              | <0.001  | 12.3                                        | 57           | 2909 (2)                | <0.001  |

<sup>a</sup>M1: linear model with only meteorological, environmental and festivities covariates  
<sup>b</sup>M2: generalized linear model with meteorological, environmental, festivities covariates and Fourier terms to control for seasonality  
\*Likelihood ratio test (LRT) comparing the regression model with ARIMA errors with M1  
\*\*Likelihood ratio test (LRT) comparing the regression model with ARIMA errors with M2

**Supplementary Figure 2**

Observed and predicted ED visits in the validation sets (from the 1st of January 2019 to the 31st of December 2019) by date and hospital.

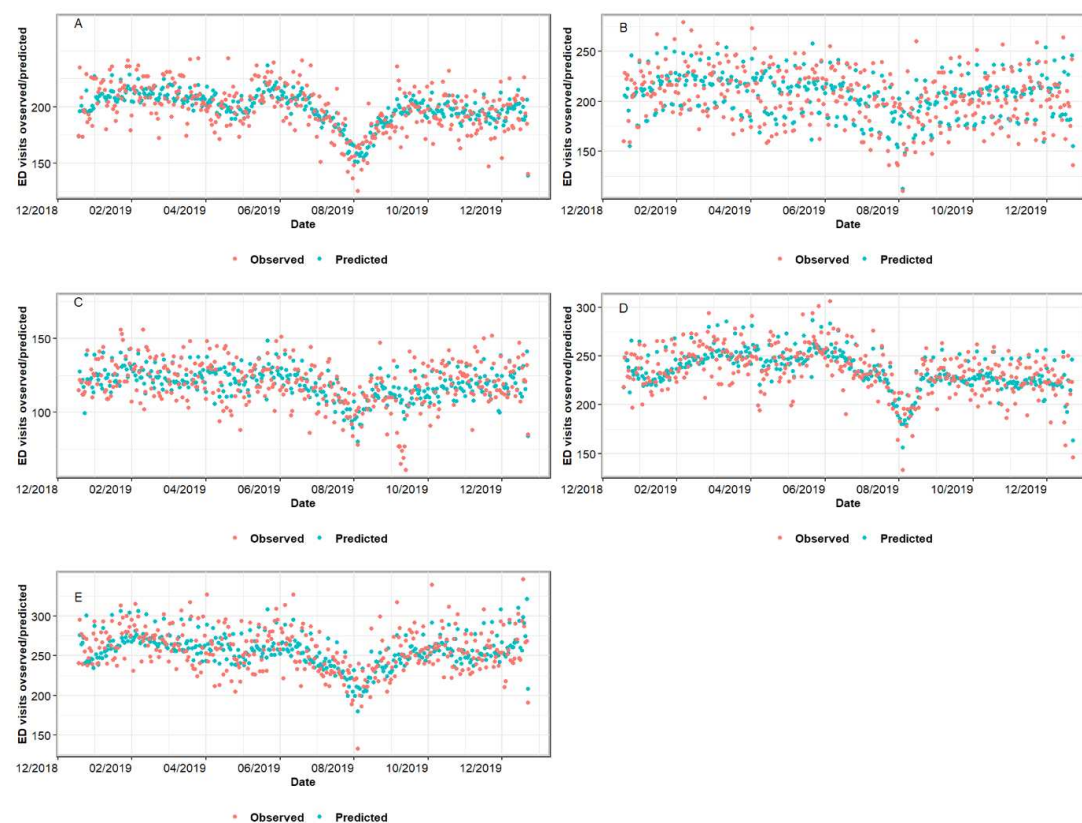

**Supplementary Table 4**

Indicators of performance (accuracy and sensitivity of high demand classification) by different definition of high demand: the number of visits exceeded the median of the preceding 7, 14 and 21 days (4a), the number of visits exceeded the mean of the preceding 7, 14, 21 and 31 days (4b), and high demand defined by the Lombardy Region as exceeding thresholds based on previous year percentiles (4c).

| 4a         | Median of the preceding 7 days |                         |                                          |        |     | Median of the preceding 14 days |                         |                                          |        |     | Median of the preceding 21 days |                         |                                          |        |     |
|------------|--------------------------------|-------------------------|------------------------------------------|--------|-----|---------------------------------|-------------------------|------------------------------------------|--------|-----|---------------------------------|-------------------------|------------------------------------------|--------|-----|
|            | Accuracy (%)                   | Observed ED high demand | Predicted ED high demand (% Sensitivity) |        |     | Accuracy (%)                    | Observed ED high demand | Predicted ED high demand (% Sensitivity) |        |     | Accuracy (%)                    | Observed ED high demand | Predicted ED high demand (% Sensitivity) |        |     |
|            |                                |                         | Green                                    | Yellow | Red |                                 |                         | Green                                    | Yellow | Red |                                 |                         | Green                                    | Yellow | Red |
| Hospital A | 72                             | Green                   | 95                                       | 5      | 0   | 73                              | Green                   | 95                                       | 5      | 0   | 73                              | Green                   | 95                                       | 5      | 0   |
|            |                                | Yellow                  | 84                                       | 16     | 0   |                                 | Yellow                  | 71                                       | 21     | 8   |                                 | Yellow                  | 72                                       | 21     | 7   |
|            |                                | Red                     | 58                                       | 32     | 10  |                                 | Red                     | 59                                       | 31     | 10  |                                 | Red                     | 46                                       | 34     | 20  |
| Hospital B | 75                             | Green                   | 97                                       | 2      | 1   | 75                              | Green                   | 97                                       | 3      | 0   | 76                              | Green                   | 96                                       | 4      | 0   |
|            |                                | Yellow                  | 80                                       | 9      | 11  |                                 | Yellow                  | 80                                       | 8      | 12  |                                 | Yellow                  | 75                                       | 16     | 9   |
|            |                                | Red                     | 38                                       | 14     | 48  |                                 | Red                     | 32                                       | 19     | 49  |                                 | Red                     | 41                                       | 10     | 49  |
| Hospital C | 64                             | Green                   | 91                                       | 6      | 3   | 66                              | Green                   | 90                                       | 6      | 4   | 67                              | Green                   | 91                                       | 6      | 3   |
|            |                                | Yellow                  | 66                                       | 16     | 18  |                                 | Yellow                  | 63                                       | 23     | 14  |                                 | Yellow                  | 72                                       | 15     | 13  |
|            |                                | Red                     | 59                                       | 22     | 19  |                                 | Red                     | 56                                       | 22     | 22  |                                 | Red                     | 47                                       | 23     | 30  |
| Hospital D | 75                             | Green                   | 92                                       | 6      | 2   | 74                              | Green                   | 90                                       | 7      | 3   | 76                              | Green                   | 92                                       | 6      | 2   |
|            |                                | Yellow                  | 68                                       | 18     | 14  |                                 | Yellow                  | 81                                       | 11     | 8   |                                 | Yellow                  | 73                                       | 16     | 11  |
|            |                                | Red                     | 47                                       | 14     | 39  |                                 | Red                     | 32                                       | 16     | 52  |                                 | Red                     | 29                                       | 10     | 61  |
| Hospital E | 70                             | Green                   | 91                                       | 5      | 4   | 72                              | Green                   | 92                                       | 6      | 2   | 74                              | Green                   | 91                                       | 6      | 3   |
|            |                                | Yellow                  | 77                                       | 4      | 19  |                                 | Yellow                  | 69                                       | 9      | 22  |                                 | Yellow                  | 64                                       | 16     | 20  |
|            |                                | Red                     | 40                                       | 23     | 37  |                                 | Red                     | 39                                       | 20     | 41  |                                 | Red                     | 38                                       | 17     | 45  |

ED=Emergency Department



| 4b         | Mean of the preceding 7 days |                         |                                          |        |     | Mean of the preceding 14 days |                         |                                          |        |     | Mean of the preceding 21 days |                         |                                          |        |     | Mean of the preceding 31 days |                         |                                          |        |     |
|------------|------------------------------|-------------------------|------------------------------------------|--------|-----|-------------------------------|-------------------------|------------------------------------------|--------|-----|-------------------------------|-------------------------|------------------------------------------|--------|-----|-------------------------------|-------------------------|------------------------------------------|--------|-----|
|            | Accuracy (%)                 | Observed ED high demand | Predicted ED high demand (% Sensitivity) |        |     | Accuracy (%)                  | Observed ED high demand | Predicted ED high demand (% Sensitivity) |        |     | Accuracy (%)                  | Observed ED high demand | Predicted ED high demand (% Sensitivity) |        |     | Accuracy (%)                  | Observed ED high demand | Predicted ED high demand (% Sensitivity) |        |     |
|            |                              |                         | Green                                    | Yellow | Red |                               |                         | Green                                    | Yellow | Red |                               |                         | Green                                    | Yellow | Red |                               |                         | Green                                    | Yellow | Red |
| Hospital A | 70                           | Green                   | 96                                       | 4      | 0   | 72                            | Green                   | 96                                       | 4      | 0   | 73                            | Green                   | 94                                       | 5      | 1   | 74                            | Green                   | 94                                       | 4      | 2   |
|            |                              | Yellow                  | 87                                       | 10     | 3   |                               | Yellow                  | 78                                       | 15     | 7   |                               | Yellow                  | 76                                       | 21     | 3   |                               | Yellow                  | 65                                       | 27     | 8   |
|            |                              | Red                     | 63                                       | 30     | 7   |                               | Red                     | 60                                       | 34     | 6   |                               | Red                     | 49                                       | 27     | 24  |                               | Red                     | 44                                       | 31     | 25  |
| Hospital B | 73                           | Green                   | 92                                       | 6      | 2   | 72                            | Green                   | 91                                       | 9      | 0   | 73                            | Green                   | 90                                       | 10     | 0   | 76                            | Green                   | 91                                       | 8      | 1   |
|            |                              | Yellow                  | 74                                       | 13     | 13  |                               | Yellow                  | 74                                       | 16     | 100 |                               | Yellow                  | 71                                       | 21     | 8   |                               | Yellow                  | 68                                       | 23     | 9   |
|            |                              | Red                     | 29                                       | 19     | 52  |                               | Red                     | 26                                       | 20     | 54  |                               | Red                     | 30                                       | 17     | 53  |                               | Red                     | 24                                       | 15     | 61  |
| Hospital C | 65                           | Green                   | 90                                       | 7      | 3   | 67                            | Green                   | 93                                       | 4      | 3   | 66                            | Green                   | 91                                       | 5      | 4   | 69                            | Green                   | 91                                       | 5      | 4   |
|            |                              | Yellow                  | 74                                       | 15     | 11  |                               | Yellow                  | 68                                       | 21     | 11  |                               | Yellow                  | 71                                       | 18     | 11  |                               | Yellow                  | 72                                       | 17     | 11  |
|            |                              | Red                     | 55                                       | 27     | 18  |                               | Red                     | 53                                       | 23     | 24  |                               | Red                     | 54                                       | 20     | 26  |                               | Red                     | 49                                       | 19     | 32  |
| Hospital D | 73                           | Green                   | 92                                       | 6      | 2   | 77                            | Green                   | 92                                       | 5      | 3   | 78                            | Green                   | 93                                       | 6      | 1   | 76                            | Green                   | 93                                       | 6      | 1   |
|            |                              | Yellow                  | 74                                       | 10     | 16  |                               | Yellow                  | 76                                       | 14     | 10  |                               | Yellow                  | 72                                       | 15     | 13  |                               | Yellow                  | 63                                       | 26     | 11  |
|            |                              | Red                     | 51                                       | 17     | 32  |                               | Red                     | 35                                       | 16     | 49  |                               | Red                     | 32                                       | 12     | 56  |                               | Red                     | 36                                       | 18     | 46  |
| Hospital E | 76                           | Green                   | 94                                       | 4      | 2   | 75                            | Green                   | 93                                       | 5      | 2   | 75                            | Green                   | 92                                       | 6      | 2   | 75                            | Green                   | 93                                       | 5      | 2   |
|            |                              | Yellow                  | 70                                       | 9      | 21  |                               | Yellow                  | 66                                       | 17     | 17  |                               | Yellow                  | 64                                       | 21     | 15  |                               | Yellow                  | 68                                       | 15     | 17  |
|            |                              | Red                     | 46                                       | 22     | 32  |                               | Red                     | 44                                       | 18     | 38  |                               | Red                     | 39                                       | 23     | 38  |                               | Red                     | 30                                       | 30     | 40  |

ED=Emergency Department

| 4c         | Mean of the preceding 7 days |                               |                                              |        |      |           |
|------------|------------------------------|-------------------------------|----------------------------------------------|--------|------|-----------|
|            |                              |                               | Predicted ED high demand<br>(%, Sensitivity) |        |      |           |
|            | Accuracy<br>(%)              | Observed<br>ED high<br>demand | Low                                          | Middle | High | Very high |
| Hospital A | 53                           | Low                           | 62%                                          | 36%    | 1%   | 1%        |
|            |                              | Middle                        | 26%                                          | 56%    | 14%  | 4%        |
|            |                              | High                          | 8%                                           | 37%    | 33%  | 22%       |
|            |                              | Very high                     | 0%                                           | 20%    | 23%  | 57%       |
| Hospital B | 64                           | Low                           | 79%                                          | 21%    | 0%   | 0%        |
|            |                              | Middle                        | 14%                                          | 73%    | 12%  | 1%        |
|            |                              | High                          | 0%                                           | 62%    | 24%  | 14%       |
|            |                              | Very high                     | 0%                                           | 15%    | 18%  | 67%       |
| Hospital C | 50                           | Low                           | 66%                                          | 31%    | 3%   | 0%        |
|            |                              | Middle                        | 21%                                          | 60%    | 14%  | 5%        |
|            |                              | High                          | 6%                                           | 56%    | 19%  | 19%       |
|            |                              | Very high                     | 4%                                           | 20%    | 38%  | 38%       |
| Hospital D | 55                           | Low                           | 67%                                          | 30%    | 3%   | 0%        |
|            |                              | Middle                        | 33%                                          | 53%    | 11%  | 3%        |
|            |                              | High                          | 11%                                          | 28%    | 44%  | 17%       |
|            |                              | Very high                     | 0%                                           | 41%    | 9%   | 50%       |
| Hospital E | 54                           | Low                           | 56%                                          | 42%    | 2%   | 0%        |
|            |                              | Middle                        | 17%                                          | 66%    | 15%  | 3%        |
|            |                              | High                          | 3%                                           | 54%    | 26%  | 17%       |
|            |                              | Very high                     | 0%                                           | 20%    | 20%  | 60%       |

ED=Emergency Department
